# Supplementary material for: A novel multi proxy approach reveals that the millennial old ice cap on Weißseespitze, Eastern Alps, has preserved its chemical and isotopic signatures despite ongoing ice loss
Source: Copernicus journal article supplement (doi:10.5194/egusphere-2023-1625), 2023-07-25
Supplement: Supplementary file 1 [file egusphere-2023-1625-supplement.pdf]

# A novel multi proxy approach reveals that the millennial old ice cap on Weißseespitze, Eastern Alps, has preserved its chemical and isotopic signatures despite ongoing ice loss

Azzurra Spagnesi<sup>1,2</sup>, Pascal Bohleber<sup>1,3</sup>, Elena Barbaro<sup>2</sup>, Matteo Feltracco<sup>1</sup>, Fabrizio De Blasi<sup>1,2</sup>, Giuliano Dreossi<sup>1,2</sup>, Martin Stocker-Waldhuber<sup>3</sup>, Daniela Festi<sup>4</sup>, Jacopo Gabrieli<sup>2</sup>, Andrea Gambaro<sup>1,2</sup>, Andrea Fischer<sup>3</sup>, Carlo Barbante<sup>1,2</sup>

## Supporting materials

**Table S1.** Villacher Alpe seasonal statistics over the period 1973-2002 and Weißseespitze statistics over the entire record. Results are obtained with statistics over the delta-18O values corrected for altitude (-0.09 ‰/100 m). SPR = AMJ; SUM = JAS; AUT = OND; WIN = JFM.

| Villacher Alpe (seasonal statistics 1973-2002) |          |          |          |
|------------------------------------------------|----------|----------|----------|
| SPR mean                                       | SUM mean | AUT mean | WIN mean |
| -11.25                                         | -9.56    | -14.05   | -14.61   |
| SPR min                                        | SUM min  | AUT min  | WIN min  |
| -12.73                                         | -10.77   | -15.26   | -15.04   |
| SPR max                                        | SUM max  | AUT max  | WIN max  |
| -10.27                                         | -8.40    | -11.95   | -14.22   |

  

| Weißseespitze (statistics over the entire record) |         |        |        |
|---------------------------------------------------|---------|--------|--------|
| mean d18O                                         | Std dev | min    | max    |
| -13.98                                            | 1.71    | -15.69 | -12.28 |

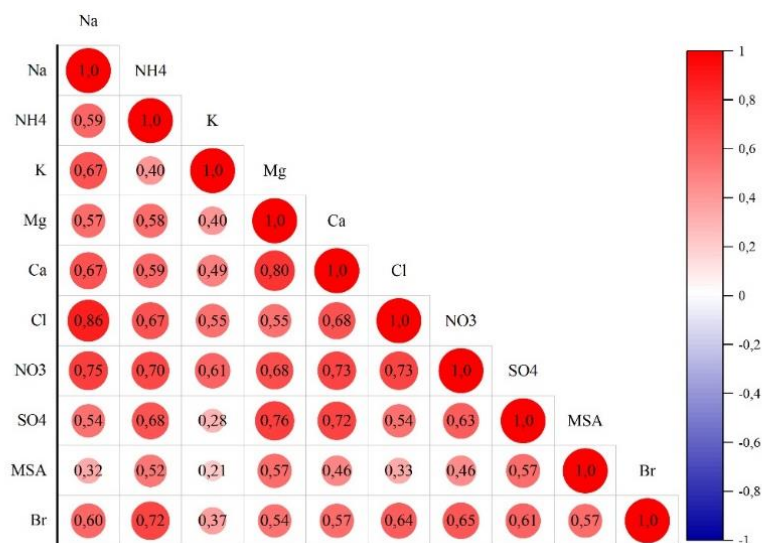

**Figure S1.** Spearman correlation matrix for major ions within the WSS ice core.

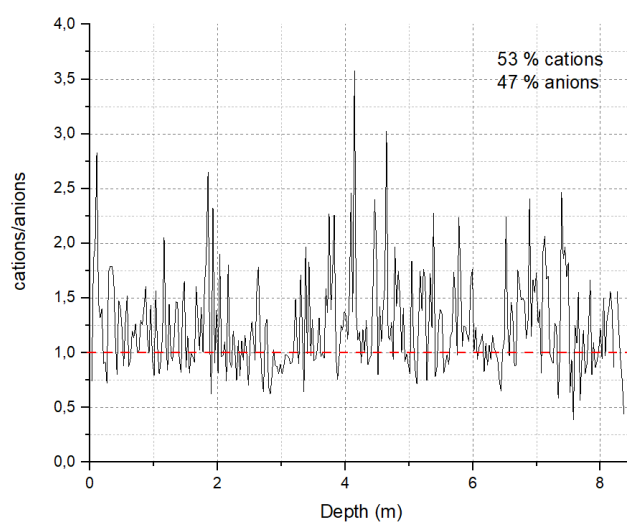

**Figure S2.** Cations/anions ratio along the WSS core depth, positively accounting for cations within 5 % of the balance.

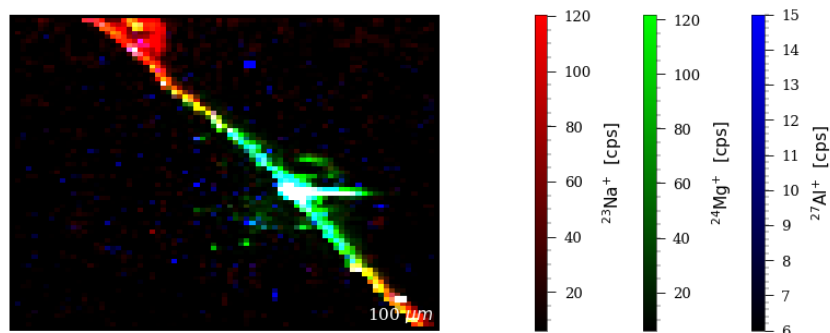

**Figure S3.** WSS ice core sample from bag 18. LA-ICP-MS image shows Na, Mg, Al in red, green and blue colorscale, respectively for an area of 3 x 4 mm.
